# Supplementary material for: Computational investigation of graphene quantum dot and tridentate Au(iii) complex composites
Source: Royal Society of Chemistry journal article supplement (doi:10.1039/d3nj02612d), 2023-01-01
Supplement: d3nj02612d1.pdf [file d3nj02612d1.pdf]

## Computational studies on the materials combining graphene quantum dots and tridentate Au(III) Complexes

### Support materials

**Table S1:** Important structural parameters based on different functional calculations

|                          | B3LYP | PBE0  | PBE0 (CH <sub>2</sub> Cl <sub>2</sub> ) | exp <sup>1</sup> |
|--------------------------|-------|-------|-----------------------------------------|------------------|
| <b>Au-N(1)</b>           | 2.078 | 2.058 | 2.050                                   | 2.035            |
| <b>Au-C(1)</b>           | 2.088 | 2.064 | 2.063                                   | 2.057            |
| <b>Au-C(2)</b>           | 2.112 | 2.087 | 2.089                                   | 2.083            |
| <b>Au-C(3)</b>           | 2.034 | 2.014 | 2.015                                   | 2.009            |
| <b>C(1)-Au-N(1)</b>      | 80.3  | 80.6  | 80.7                                    | 81.0             |
| <b>C(2)-Au-N(1)</b>      | 79.2  | 79.6  | 79.7                                    | 79.9             |
| <b>C(1)-Au-C(3)-C(4)</b> | 89.5  | 107.1 | 88.5                                    | 88.6             |

**Figure**

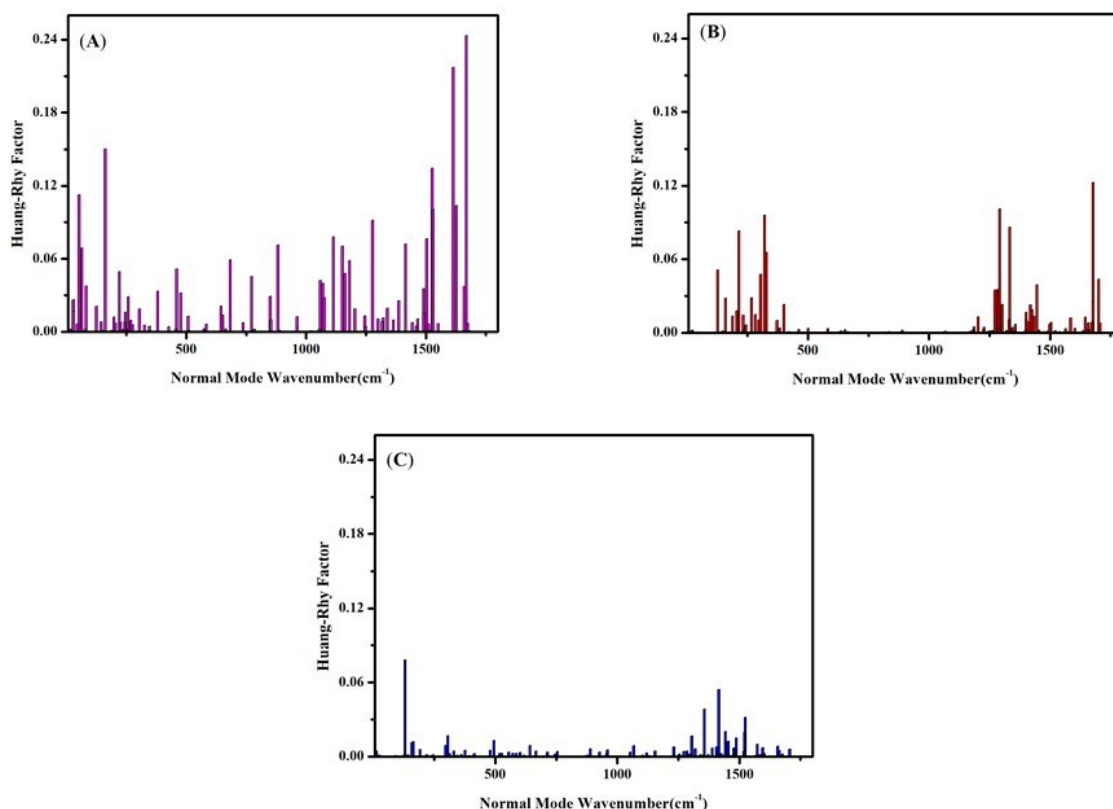

calculated Huang-Rhys factors versus the normal mode wavenumber at the ground state for **Au1(A)**, **Au2(B)** and **Au3(C)**

- (1) Tang, M. C.; Lee, C. H.; Lai, S. L.; Ng, M.; Chan, M. Y.; & Yam, V. W. Versatile Design Strategy for Highly Luminescent Vacuum-Evaporable and Solution-Processable Tridentate Gold(III) Complexes with Monoaryl Auxiliary Ligands and Their Applications for Phosphorescent Organic Light Emitting Devices. *Journal of the American Chemical Society* **2017**, 139, 9341-9349.

**Table S2 Critical geometric structural parameters of Au1, Au2 and Au3 <sup>3</sup>MC state at**

PBE0/LANL2DZ level

| Structural parameters | Au1             |        | Au2             |       | Au3             |       |
|-----------------------|-----------------|--------|-----------------|-------|-----------------|-------|
|                       | <sup>3</sup> MC | MECP   | <sup>3</sup> MC | MECP  | <sup>3</sup> MC | MECP  |
| Au-N(1)               | 2.256           | 2.292  | 2.269           | 2.345 | 2.270           | 2.463 |
| Au-C(1)               | 2.325           | 2.793  | 2.866           | 2.993 | 2.853           | 3.008 |
| Au-C(2)               | 2.180           | 2.148  | 2.157           | 2.136 | 2.157           | 2.106 |
| Au-C(3)               | 2.042           | 2.027  | 2.026           | 2.025 | 2.026           | 2.037 |
| C(1)-Au-N(1)          | 71.78           | 66.29  | 66.28           | 63.58 | 66.33           | 62.23 |
| C(2)-Au-N(1)          | 73.21           | 74.33  | 75.17           | 74.20 | 75.02           | 72.62 |
| C(1)-Au-C(3)-C(4)     | 111.64          | 114.96 | 64.54           | 64.27 | 64.39           | 61.15 |

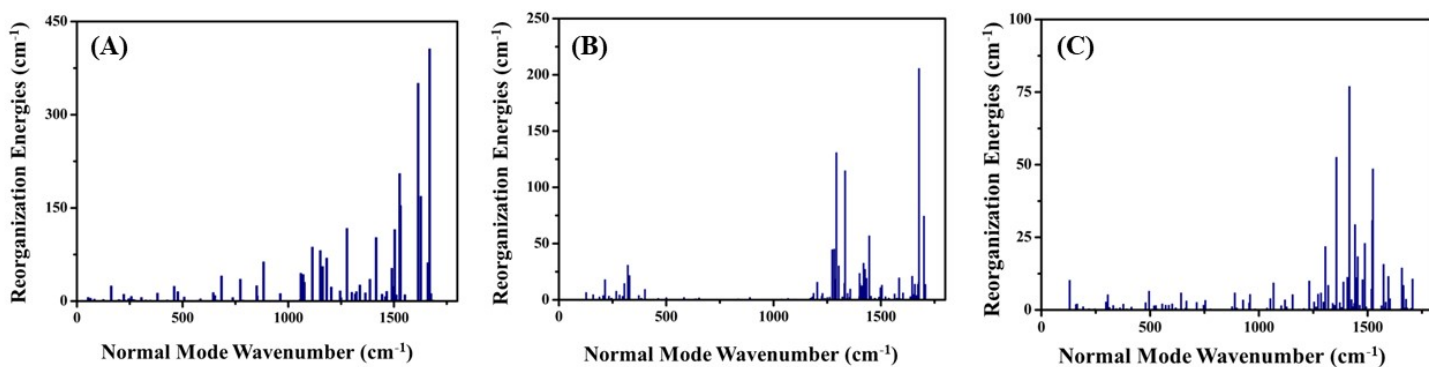

**Figure S2.** Reorganization energy of complexes **Au1** (A), **Au2** (B) and **Au3** (C) at regularized mode frequencies.

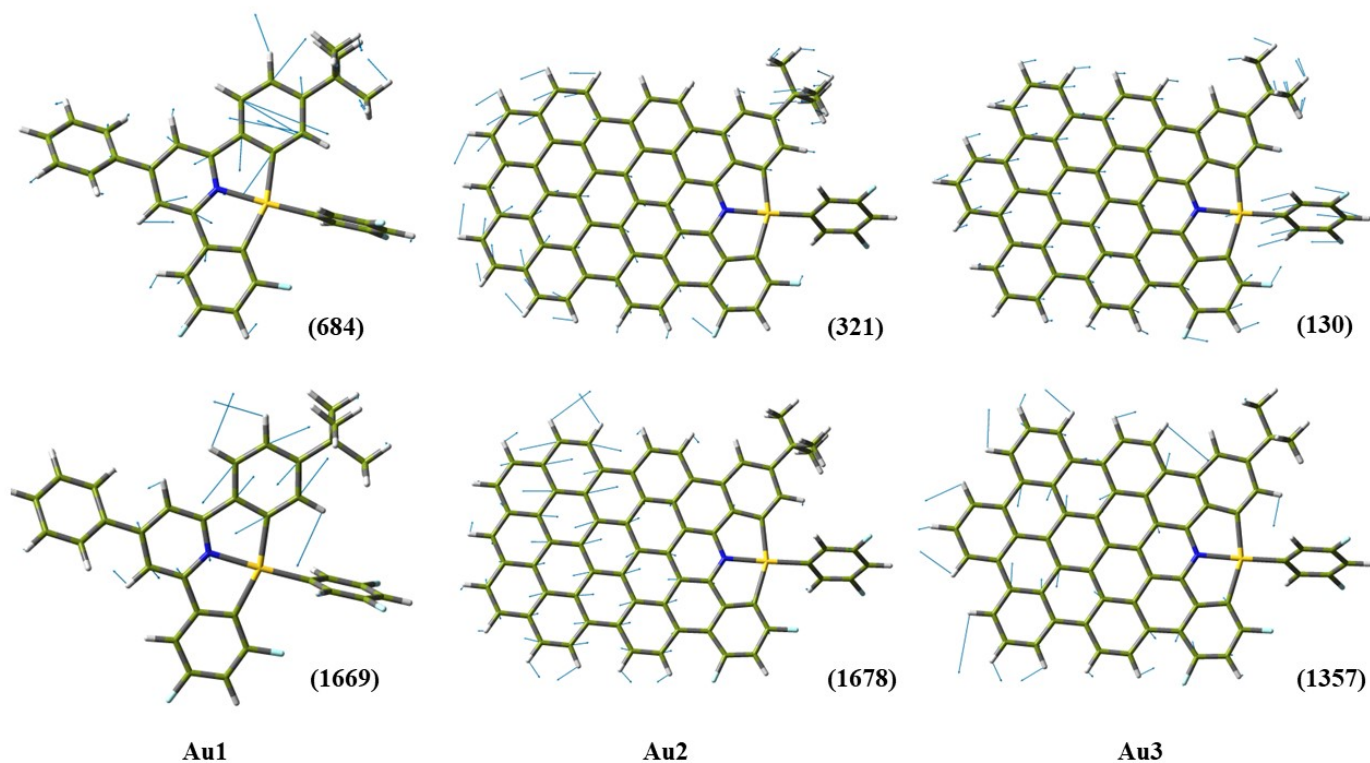

**Figure S3.** Positive mode displacement vectors with maximum reorganization energy and regularized mode frequencies for Au1, Au2 and Au3.

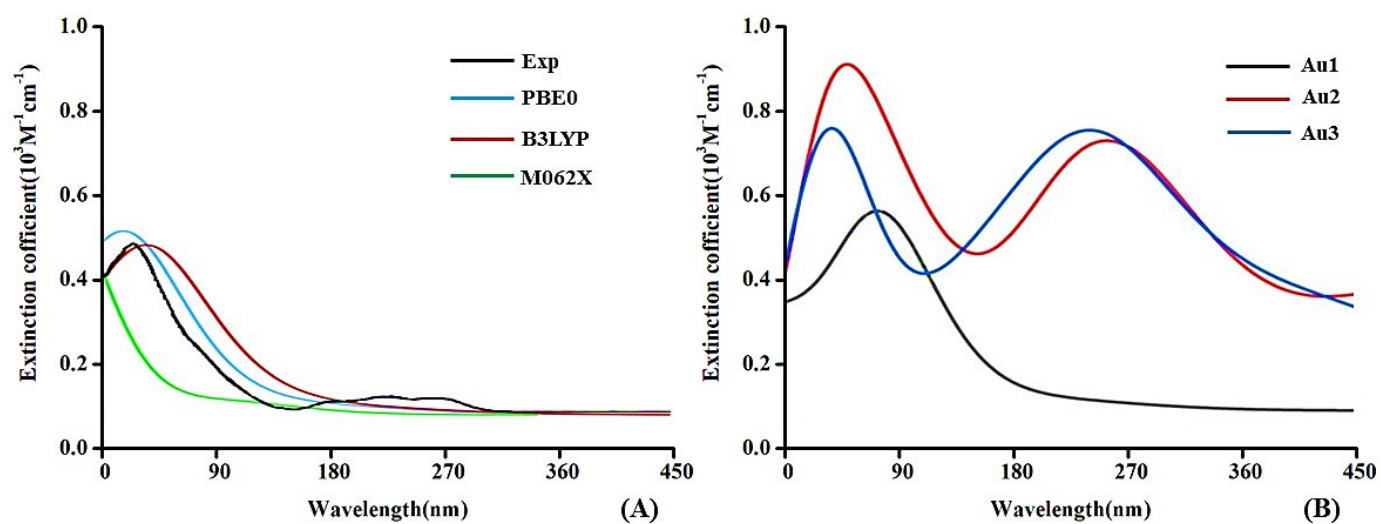

**Figure S4.** (A) The absorption data of Au1 based on different functional calculations and the corresponding experimental values; (B) Computational simulation of the absorption spectra of the studied complexes.
